# Supplementary material for: Terminally sialylated and fucosylated complex N-glycans are involved in the malignant behavior of high-grade glioma
Source: PubMed Central journal article supplement (PMC7779250; doi:10.18632/oncotarget.27850), 2020-12-29
Supplement: oncotarget-11-4822-s001.pdf [file oncotarget-11-4822-s001.pdf]

# Terminally sialylated and fucosylated complex N-glycans are involved in the malignant behavior of high-grade glioma

## SUPPLEMENTARY MATERIALS

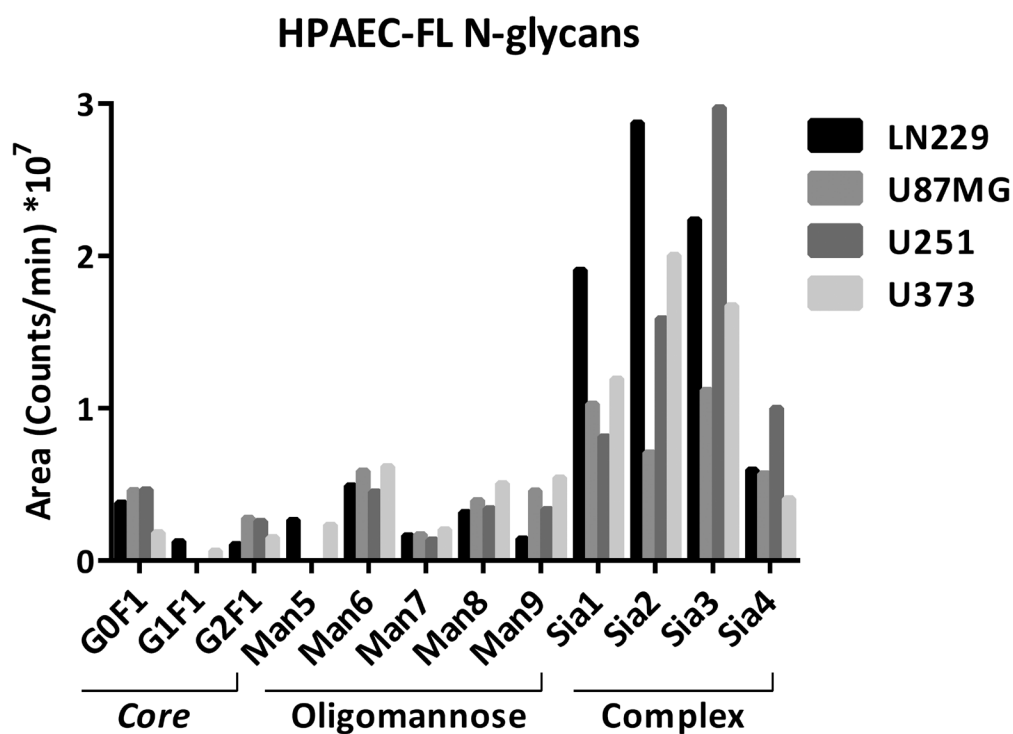

Supplementary Figure 1: N-glycans analysis by HPAEC-FL of LN229, U87MG, U251 and U373 cell lines. G: Galactose; F: Fucose; Sia: sialic acid.

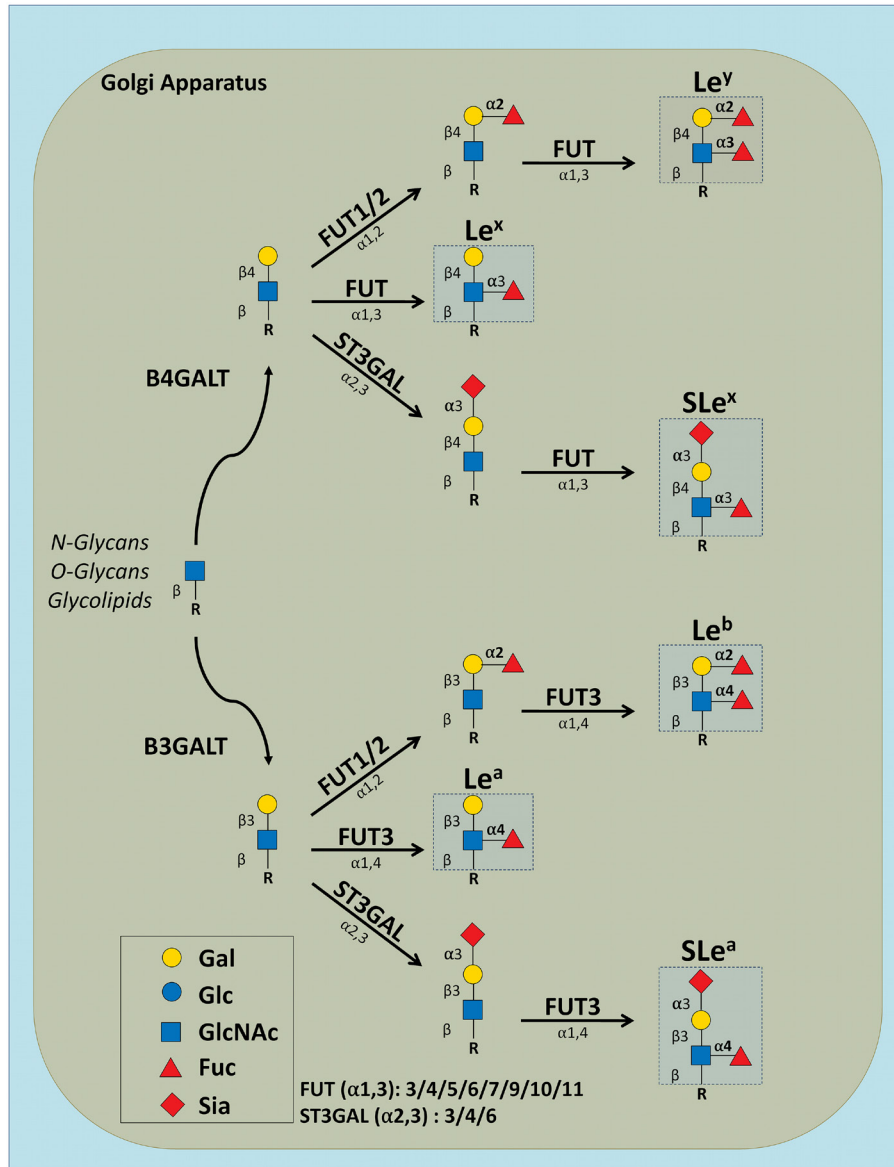

Supplementary Figure 2: Biosynthetic pathway of Lewis glycan family.

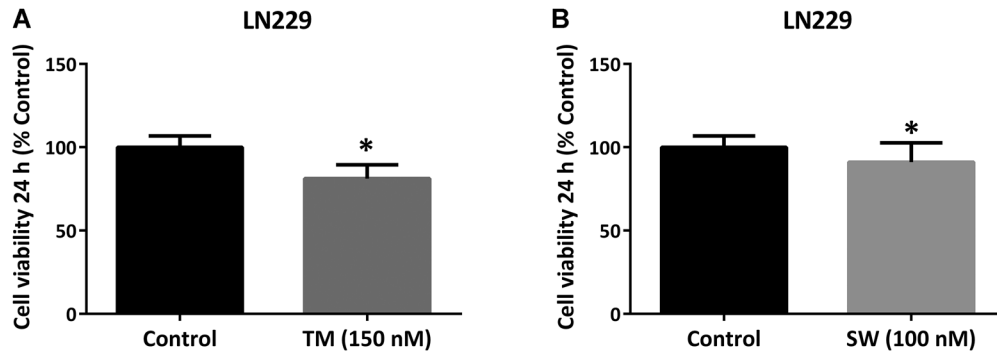

**Supplementary Figure 3: Evaluation of LN229 cell viability after 24 h of inhibition of N-glycosylation.** (A) Treatment with 150 nM of TNM. (B) Treatment with 100 nM of SW. Data represent rMFI means  $\pm$  S.D. of triplicate determinants ( $p < 0.05$ , *T* Test).

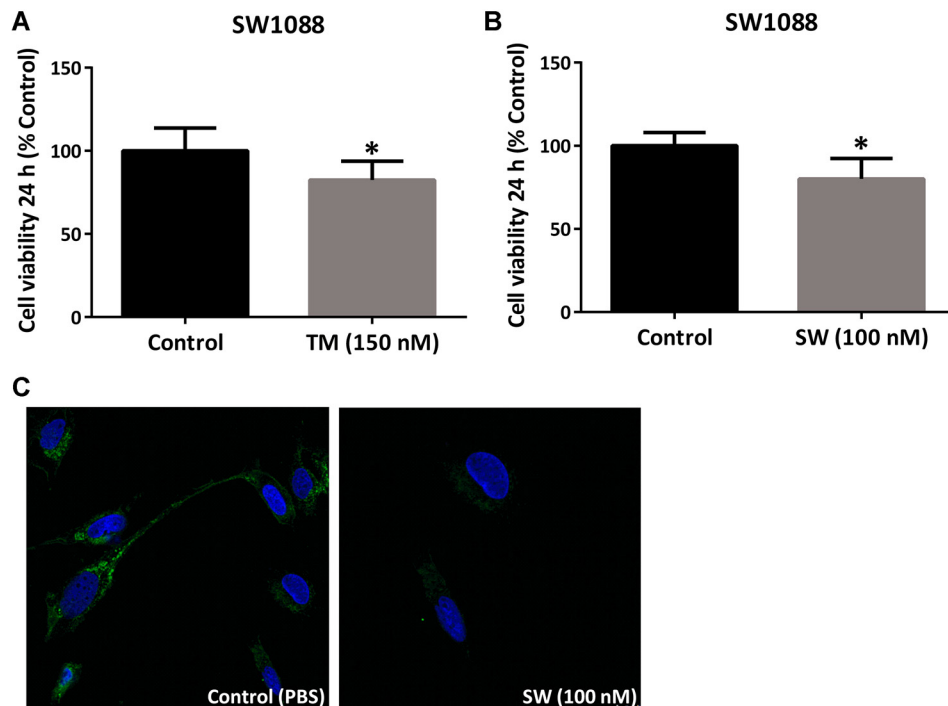

**Supplementary Figure 4: Inhibition of N-glycosylation of low-grade SW1088 glioma cell line.** Cell viability after treatment with 150 nM of TNM (A) or 100 nM of SW (B) for 24 h. Data represent rMFI means  $\pm$  S.D. of triplicate determinants ( $p < 0.05$ , *T* Test.). (C) Confocal microscopy of untreated SW1088 cells (PSB control) and treated (100 nM SW) cells, stained with PHA-L-fluorescein.

**Supplementary Table 1: Glycan expression evaluated by flow cytometry in the high- and low-grade glioma cell lines**

| Lewis Glycans                | High-Grade Glioma  |             |                    |             |                    |                    |                    | Low-Grade Glioma   |             |             |
|------------------------------|--------------------|-------------|--------------------|-------------|--------------------|--------------------|--------------------|--------------------|-------------|-------------|
|                              | A172               | LN18        | LN229              | U87MG       | U118               | U251               | U373               | T98G               | SW1088      | HS683       |
| Le <sup>a</sup>              | 0.97 ± 0.12        | 1.26 ± 0.09 | 0.99 ± 0.20        | 1.07 ± 0.02 | 0.99 ± 0.04        | 1.33 ± 0.05        | 1.01 ± 0.05        | 0.99 ± 0.10        | 1.02 ± 0.05 | 1.01 ± 0.12 |
| Sl <sup>e</sup>              | 0.90 ± 0.12        | 0.94 ± 0.20 | 1.26 ± 0.09        | 1.02 ± 0.03 | 1.01 ± 0.03        | 1.17 ± 0.06        | 1.03 ± 0.05        | 1.01 ± 0.10        | 1.11 ± 0.06 | 1.04 ± 0.10 |
| Le <sup>b</sup>              | 0.96 ± 0.10        | 1.25 ± 0.11 | 1.19 ± 0.06        | 1.16 ± 0.12 | 1.02 ± 0.10        | 1.32 ± 0.12        | 1.01 ± 0.10        | 1.01 ± 0.08        | 1.15 ± 0.06 | 1.12 ± 0.10 |
| Le <sup>c</sup>              | 0.95 ± 0.09        | 1.04 ± 0.10 | 1.12 ± 0.11        | 0.97 ± 0.09 | 1.05 ± 0.04        | 1.21 ± 0.04        | 1.02 ± 0.12        | 1.05 ± 0.06        | 0.97 ± 0.02 | 1.16 ± 0.05 |
| SL <sup>e</sup> <sup>c</sup> | <b>1.60 ± 0.17</b> | 1.05 ± 0.06 | <b>2.84 ± 0.45</b> | 1.26 ± 0.12 | <b>1.50 ± 0.08</b> | <b>1.82 ± 0.42</b> | <b>1.87 ± 0.14</b> | <b>3.83 ± 0.60</b> | 1.14 ± 0.09 | 1.03 ± 0.09 |
| Le <sup>v</sup>              | 1.47 ± 0.20        | 1.15 ± 0.06 | 1.18 ± 0.07        | 1.10 ± 0.13 | 1.16 ± 0.01        | 1.21 ± 0.06        | 1.02 ± 0.03        | 1.48 ± 0.12        | 1.04 ± 0.10 | 1.09 ± 0.07 |
| <b>Truncated</b>             |                    |             |                    |             |                    |                    |                    |                    |             |             |
| <b>O-Glycans</b>             |                    |             |                    |             |                    |                    |                    |                    |             |             |
| T                            | 1.14 ± 0.10        | 1.01 ± 0.05 | 1.05 ± 0.06        | 1.09 ± 0.10 | 0.95 ± 0.03        | 0.94 ± 0.09        | 1.12 ± 0.08        | 1.05 ± 0.10        | 1.01 ± 0.03 | ND          |
| Tn                           | 1.07 ± 0.12        | 0.99 ± 0.10 | 0.99 ± 0.10        | 1.32 ± 0.09 | 0.97 ± 0.10        | 1.01 ± 0.08        | 1.23 ± 0.02        | 1.29 ± 0.08        | 1.02 ± 0.10 | ND          |
| STn                          | 1.04 ± 0.09        | 1.05 ± 0.10 | 1.06 ± 0.10        | 0.99 ± 0.06 | 1.02 ± 0.10        | 1.24 ± 0.20        | 0.96 ± 0.10        | 1.18 ± 0.06        | 1.14 ± 0.10 | ND          |

The data represent rMFI means ± S.D of three independent experiments. ND: Not Determined. High expression was considered greater than 1.5 rMFI, medium between 1.25 and 1.5 rMFI, and low as lower than 1.25 rMFI.

**Supplementary Table 2: Sequence of the primers used for the analysis of glycosyltransferases by quantitative RT-PCR**

| Gene    | Forward Primer           | Reverse Primer            |
|---------|--------------------------|---------------------------|
| ACTB    | CAAGATCATTGCTCCTCCTG     | AGCACTTGCGGTGCACGATG      |
| C2GNT1  | AAGCAGTTGCCAGGTTTG       | ACACTGAGCGCACATGGAC       |
| FUT3    | GGGTAAAGAGCTCAGAGTTCAGAC | AGCAGCAATTTCCCTCAACCC     |
| FUT4    | TTGCACAGCTAGCAATTGGG     | ATTCAGGAAACCGCCTCAAC      |
| FUT5    | AAGCCACATCGCATTGAAGC     | TGGAGCCCGGACATCCTTTG      |
| FUT6    | CACCTCCGAGGCATCTTCAACTG  | CGTTGGTATCGGCTCTCATTTCATG |
| FUT7    | CACCTCCGAGGCATCTTCAACTG  | CGTTGGTATCGGCTCTCATTTCATG |
| FUT8    | GGTCGAGCTTCCCATTGTAG     | GCGAGGTCTTCTGGTACAGC      |
| FUT9    | CTTACCGCCGTGATTCAGAT     | AATGCTTGCCCGTAGGTATG      |
| FUT11   | CTCTTGGCTTTCTTGTC        | ATGACGGAGTGATTGTTC        |
| ST3GAL3 | TCTCCGCTGTGGTCATTTAGG    | AGTACCAGAAAGAGGCAGAGG     |
| ST3GAL4 | AGTAGAAAACAACCCAGACAC    | AGAGGTTGAGAATCCGAA        |
| ST3GAL6 | AGAGTCCTTTGCACTACTATGG   | CACTGTTAGCATCATCTTCTGAG   |
| MGAT5   | AGCCTGAAAGCAGCTCCAT      | GCCAGTGCCTTGATGTACCT      |

Human ACTB gene ( $\beta$ -actin) was used as endogenous control.
